# Supplementary material for: Functional and Structural Analysis of a Highly-Expressed Yersinia pestis Small RNA following Infection of Cultured Macrophages
Source: PubMed Central journal article supplement (PMC5193452; doi:10.1371/journal.pone.0168915), 2016-12-28

S1 Figure. Expression plots of analyzed sRNAs.

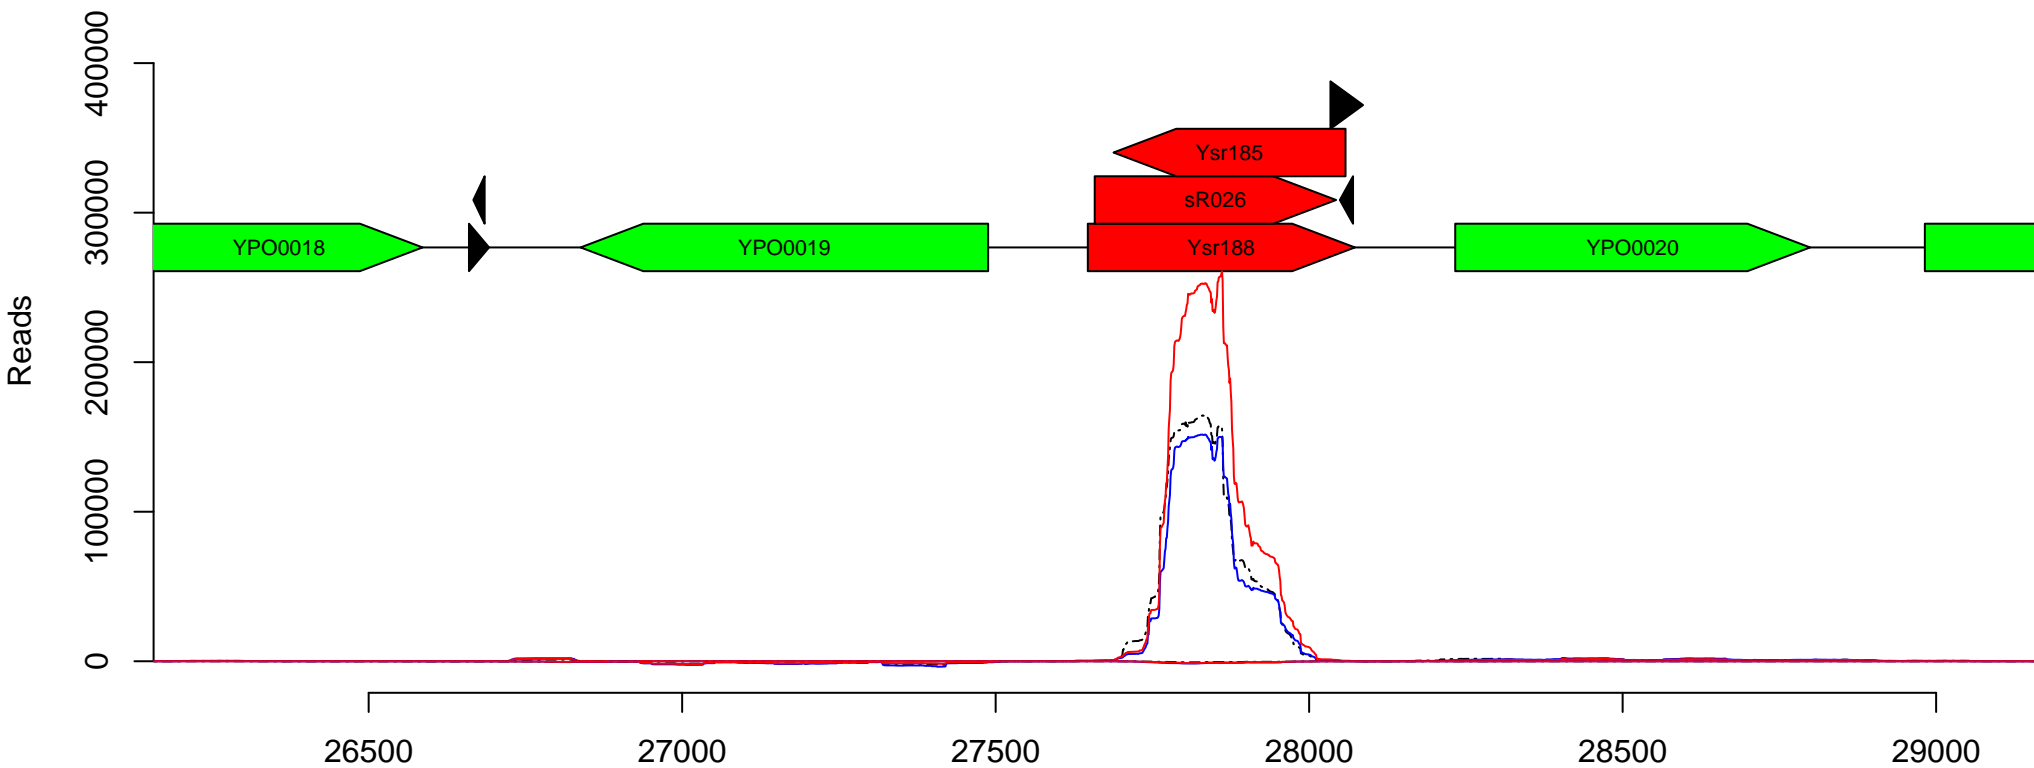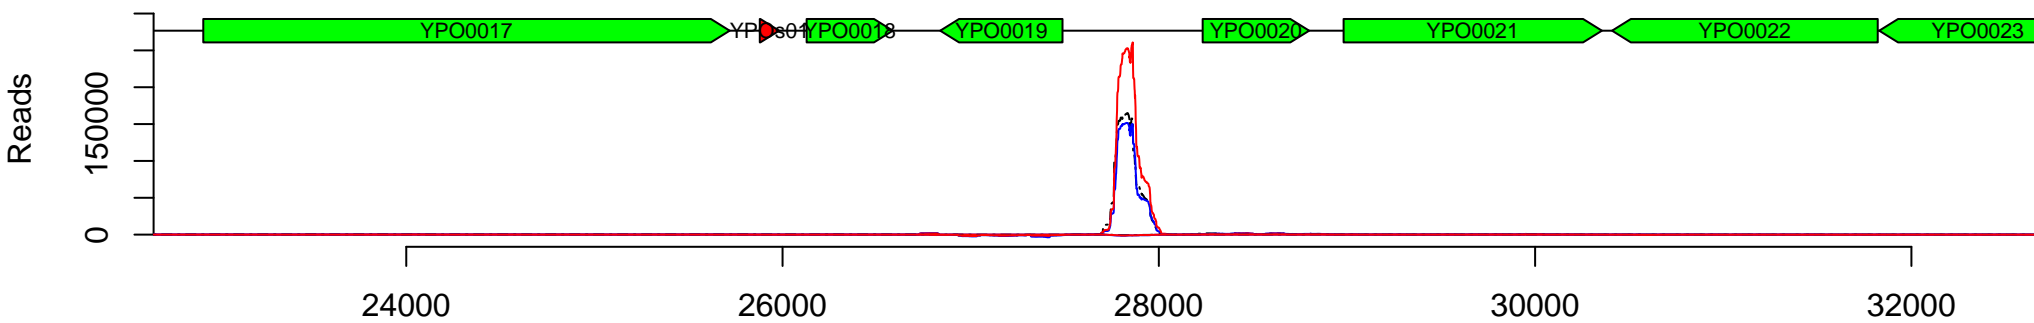

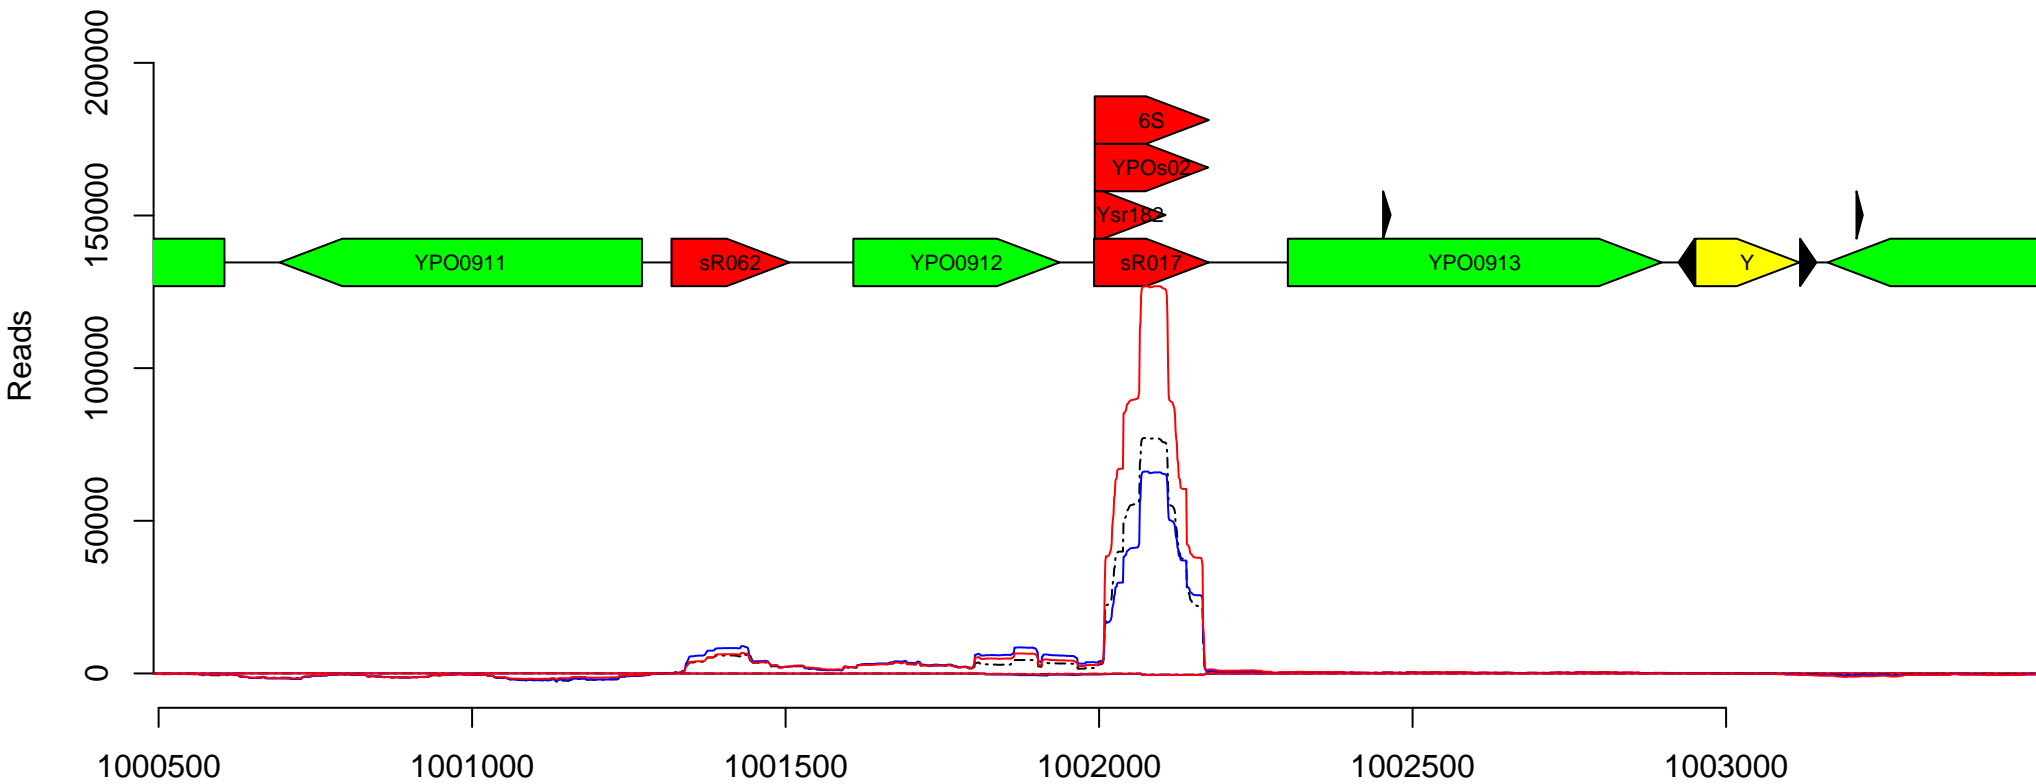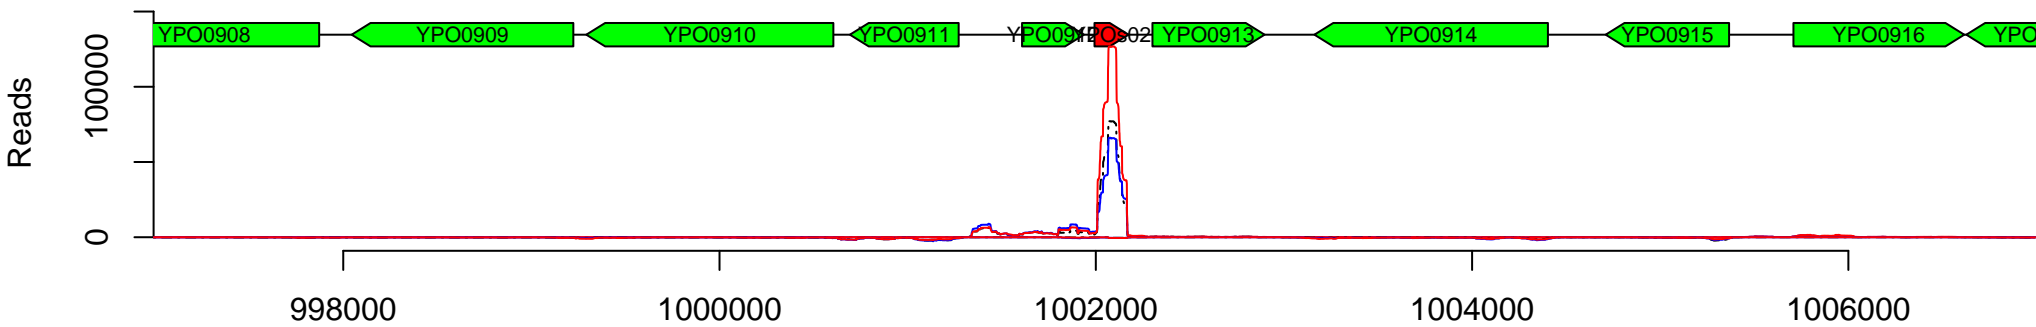

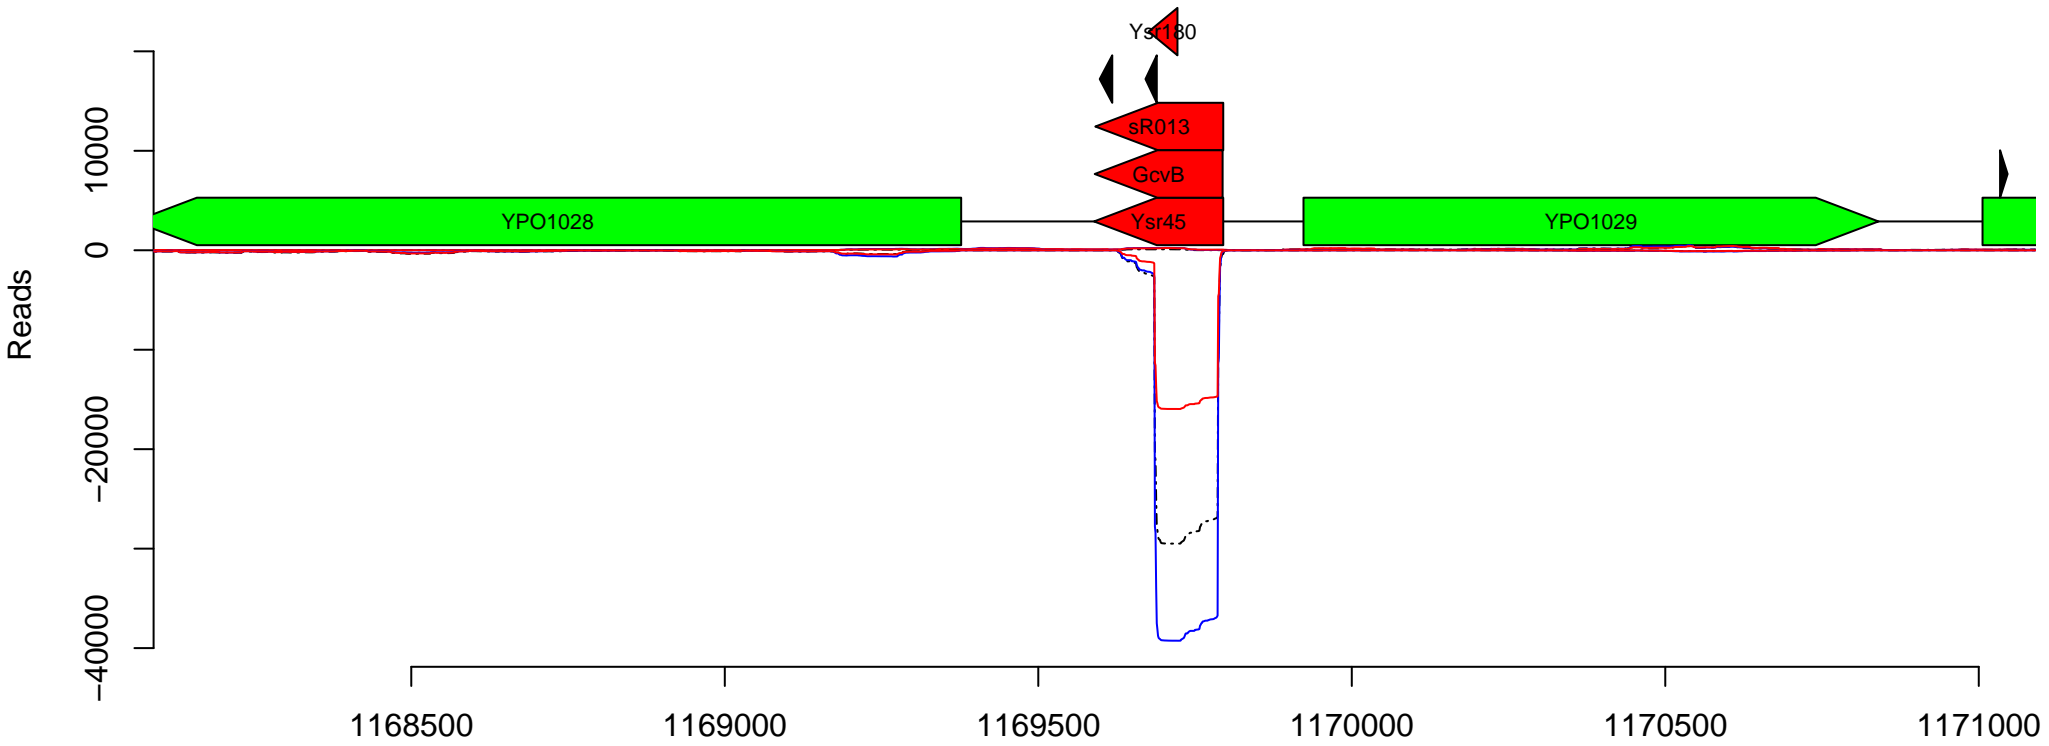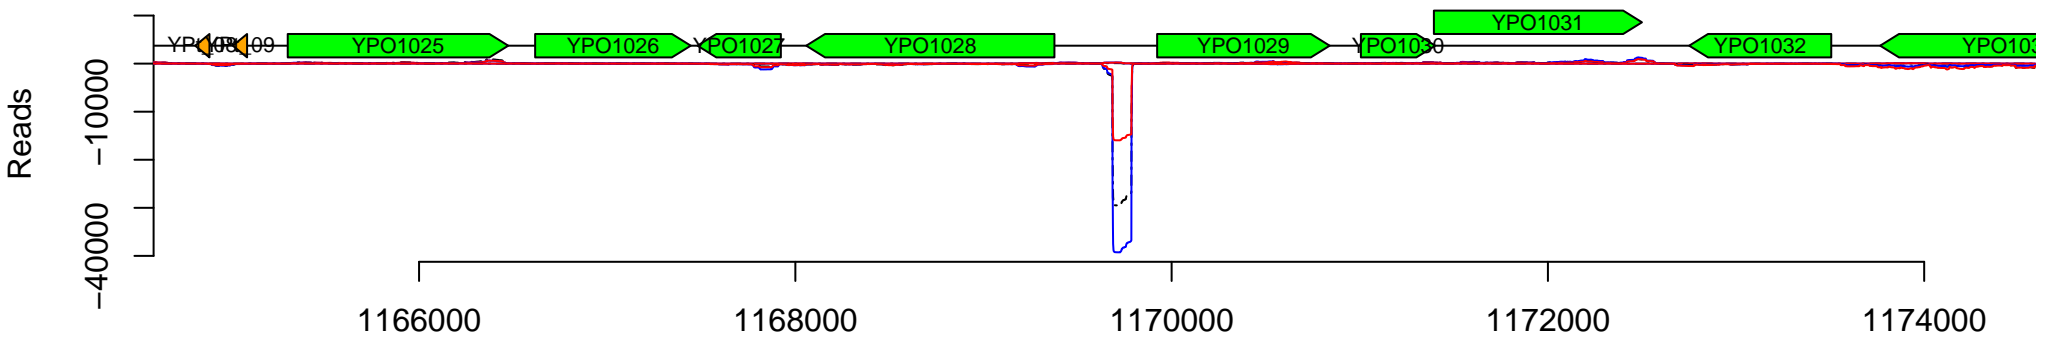

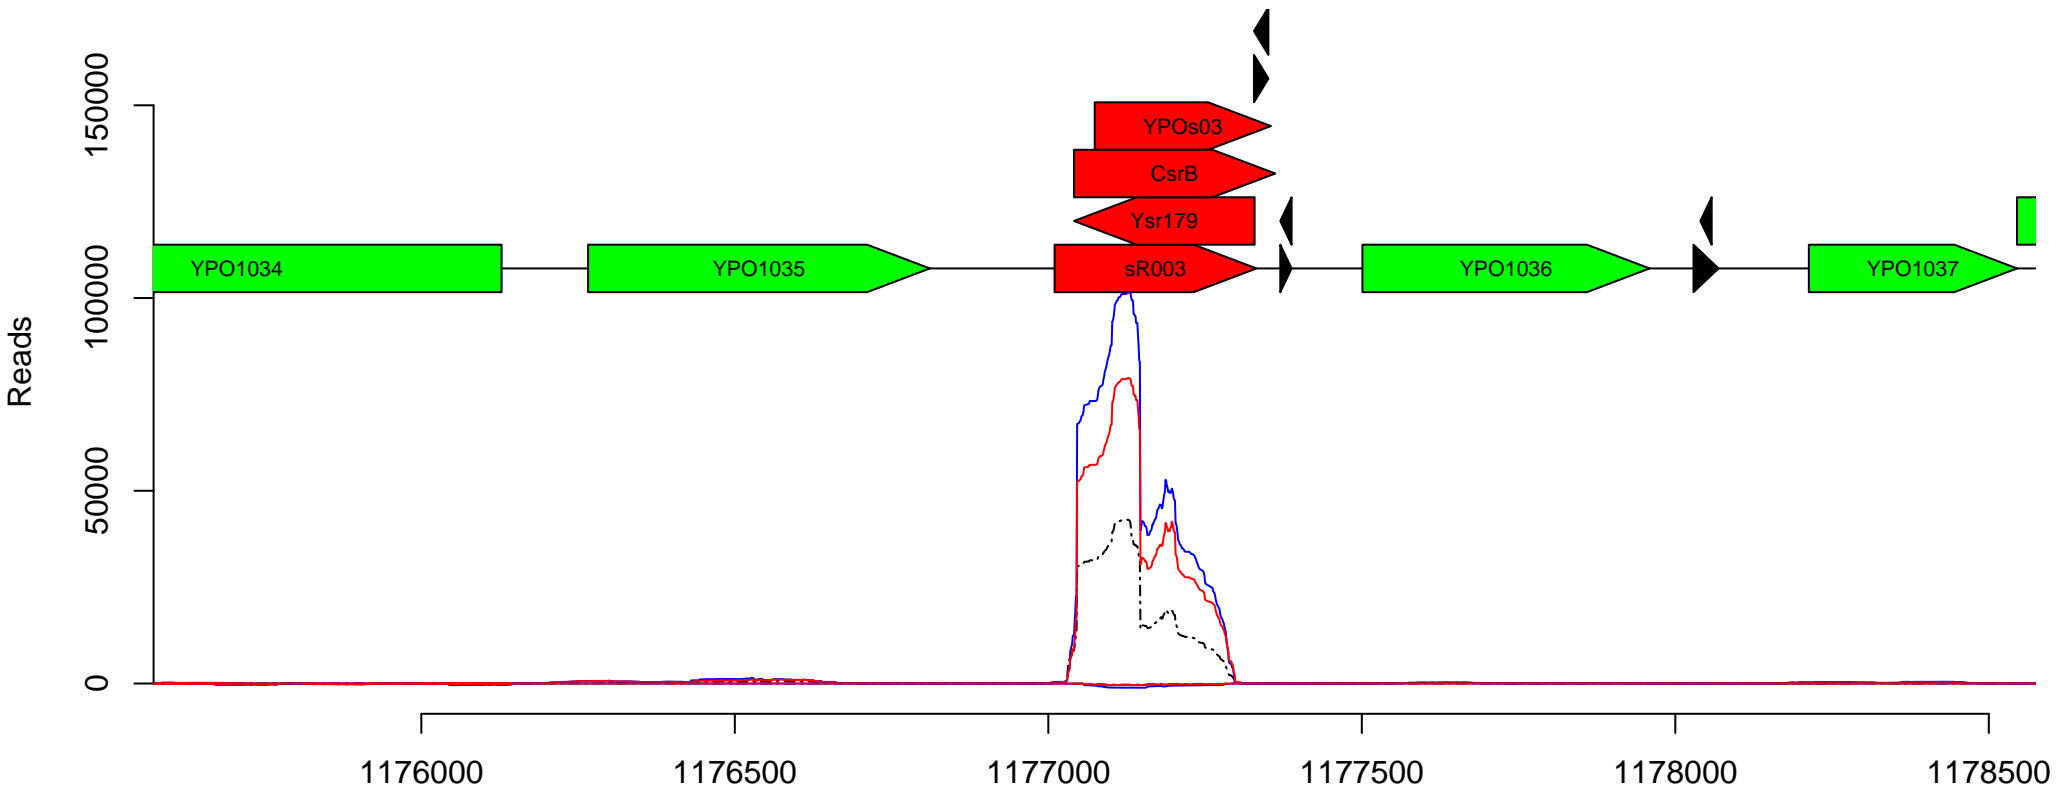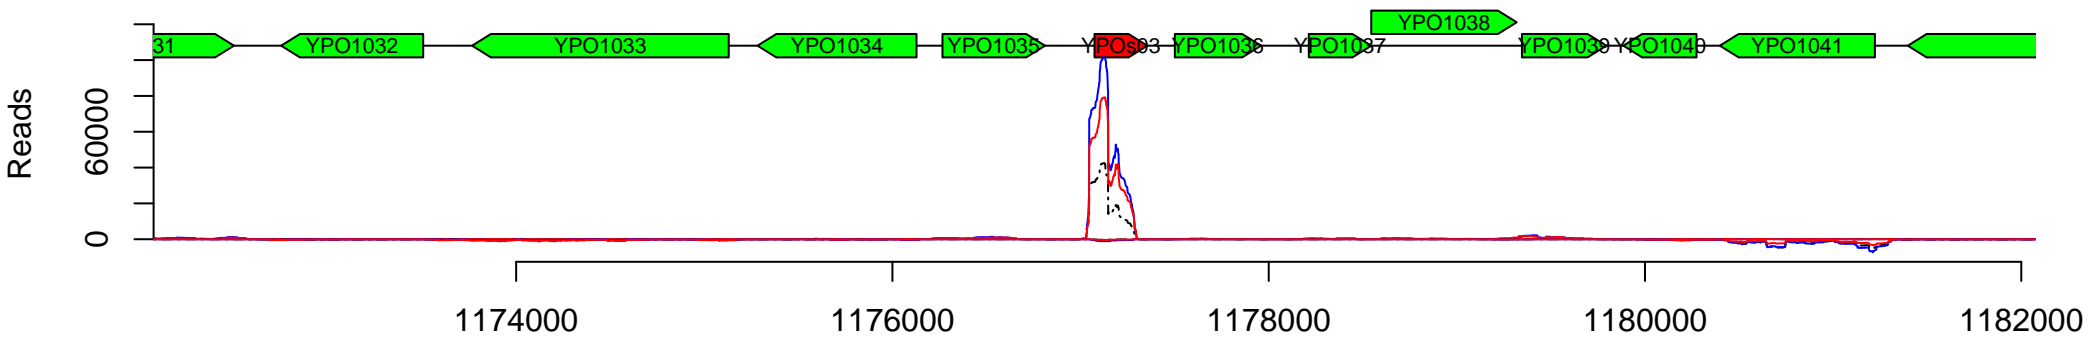

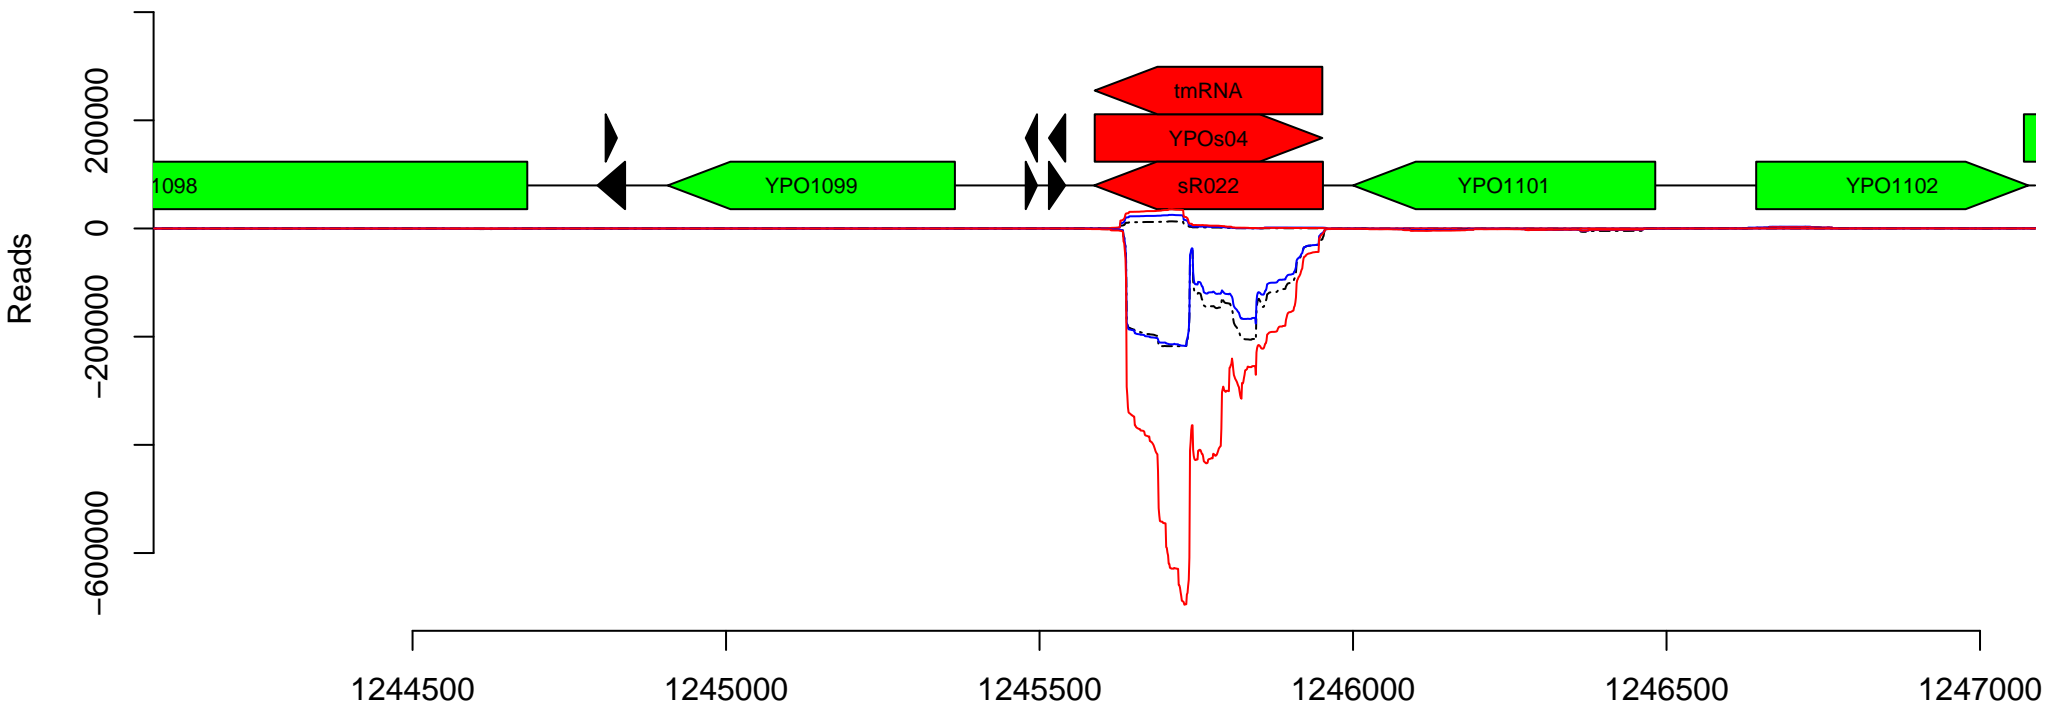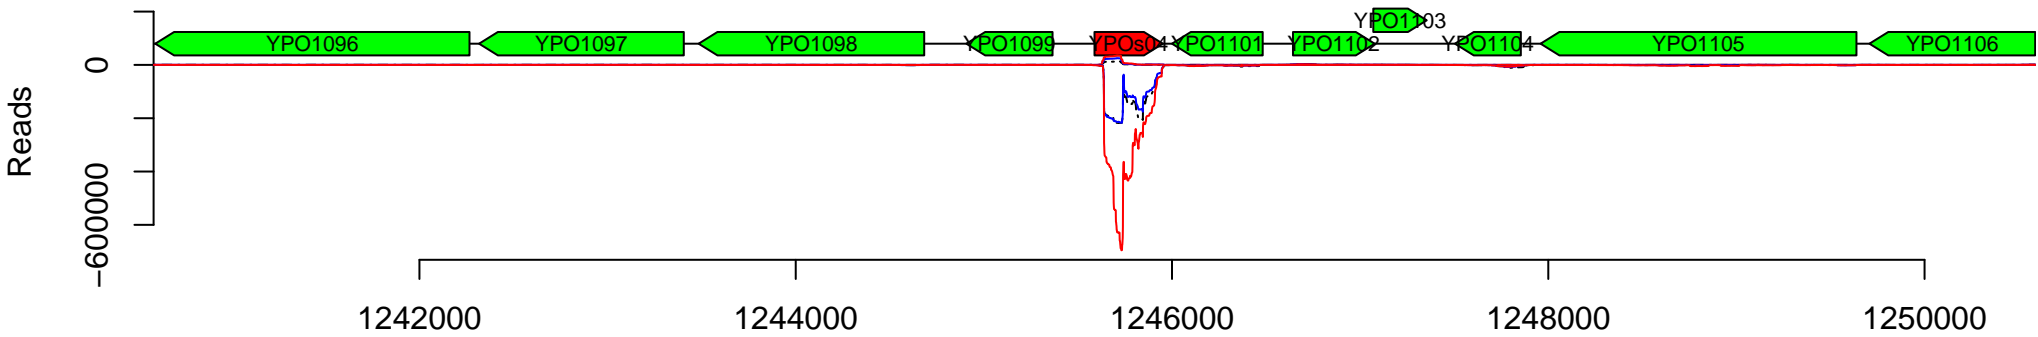

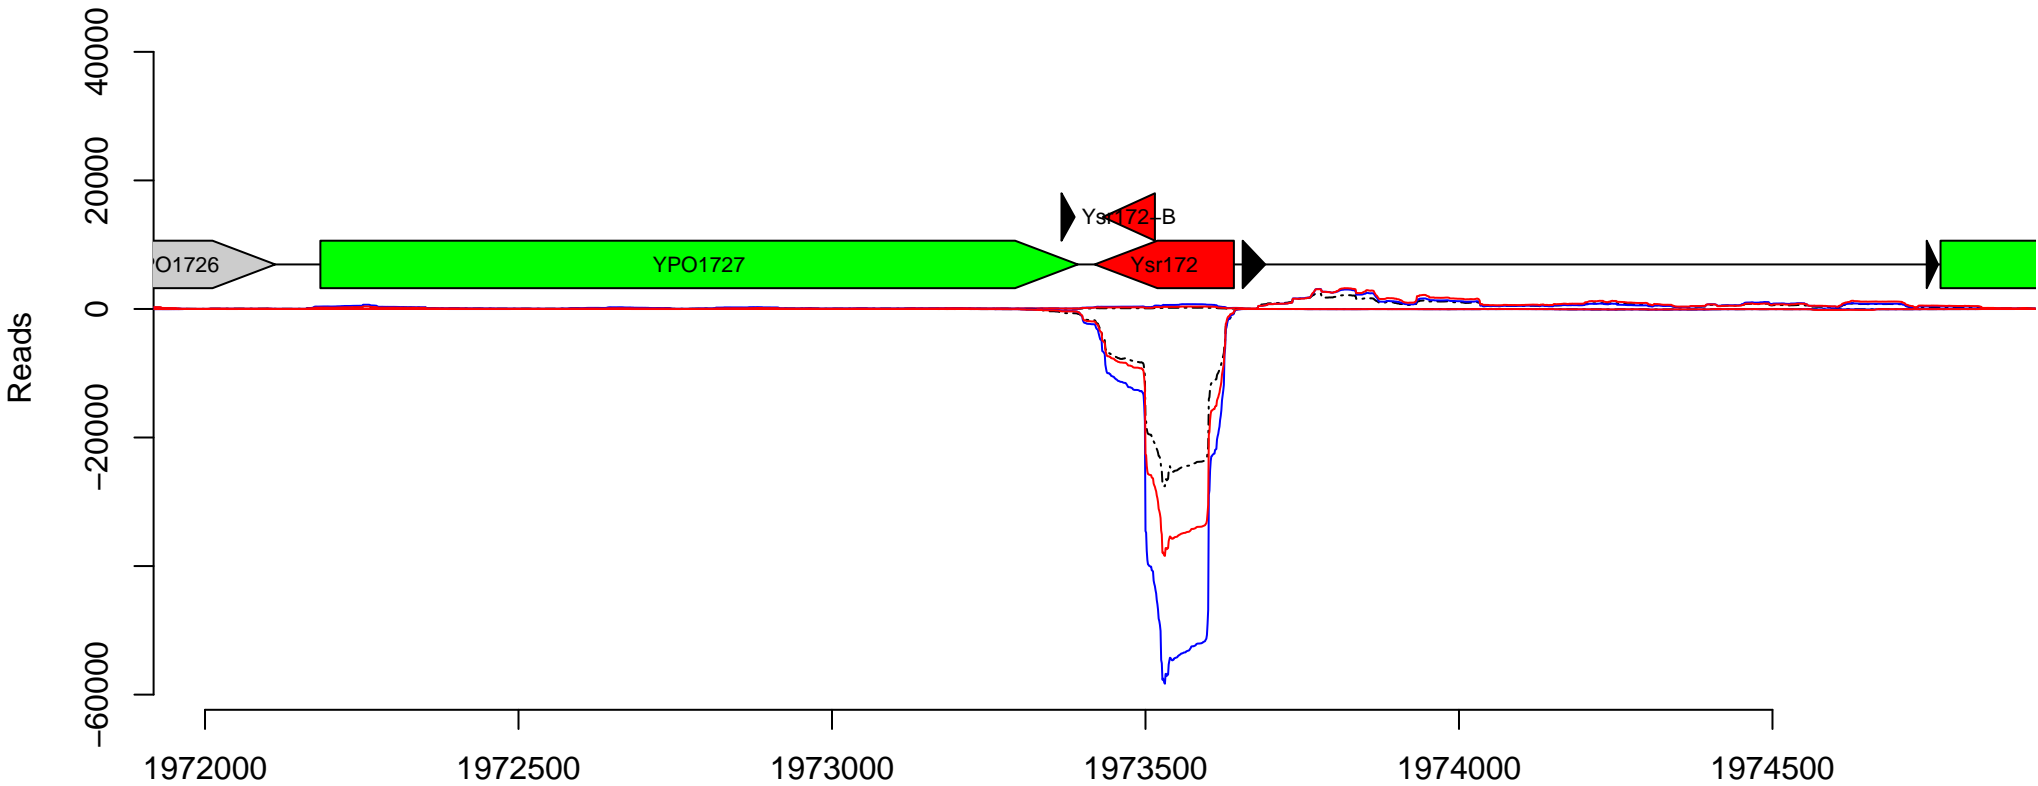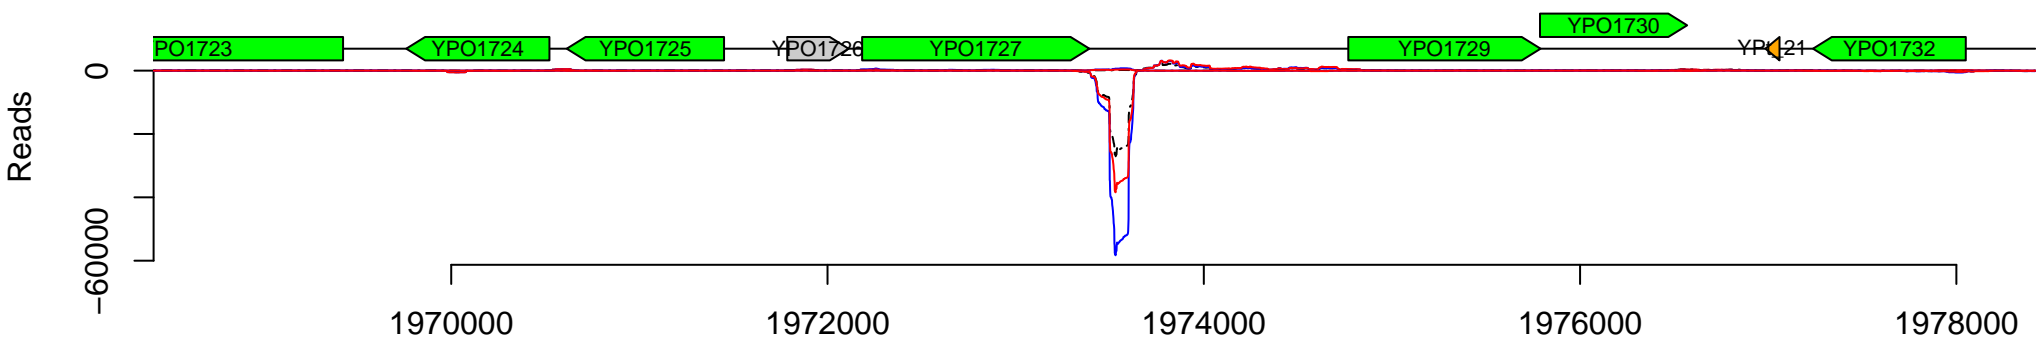

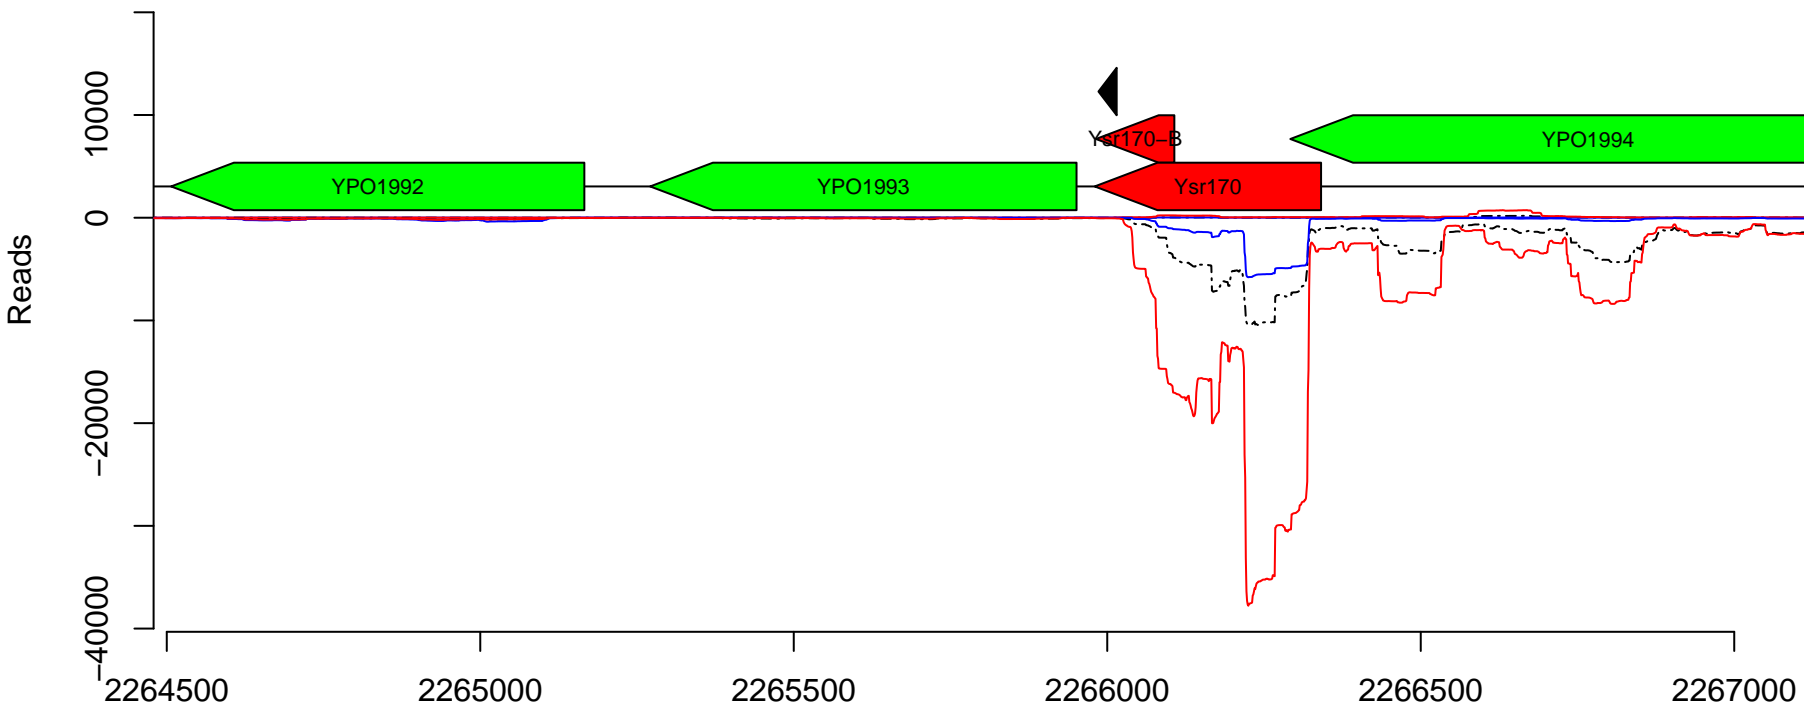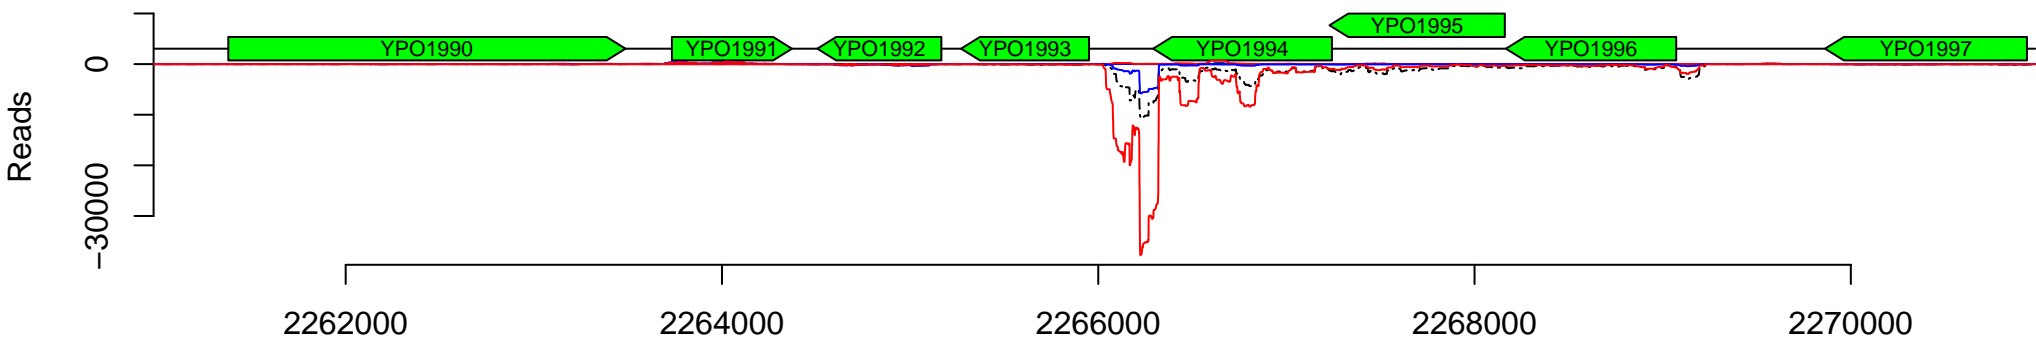

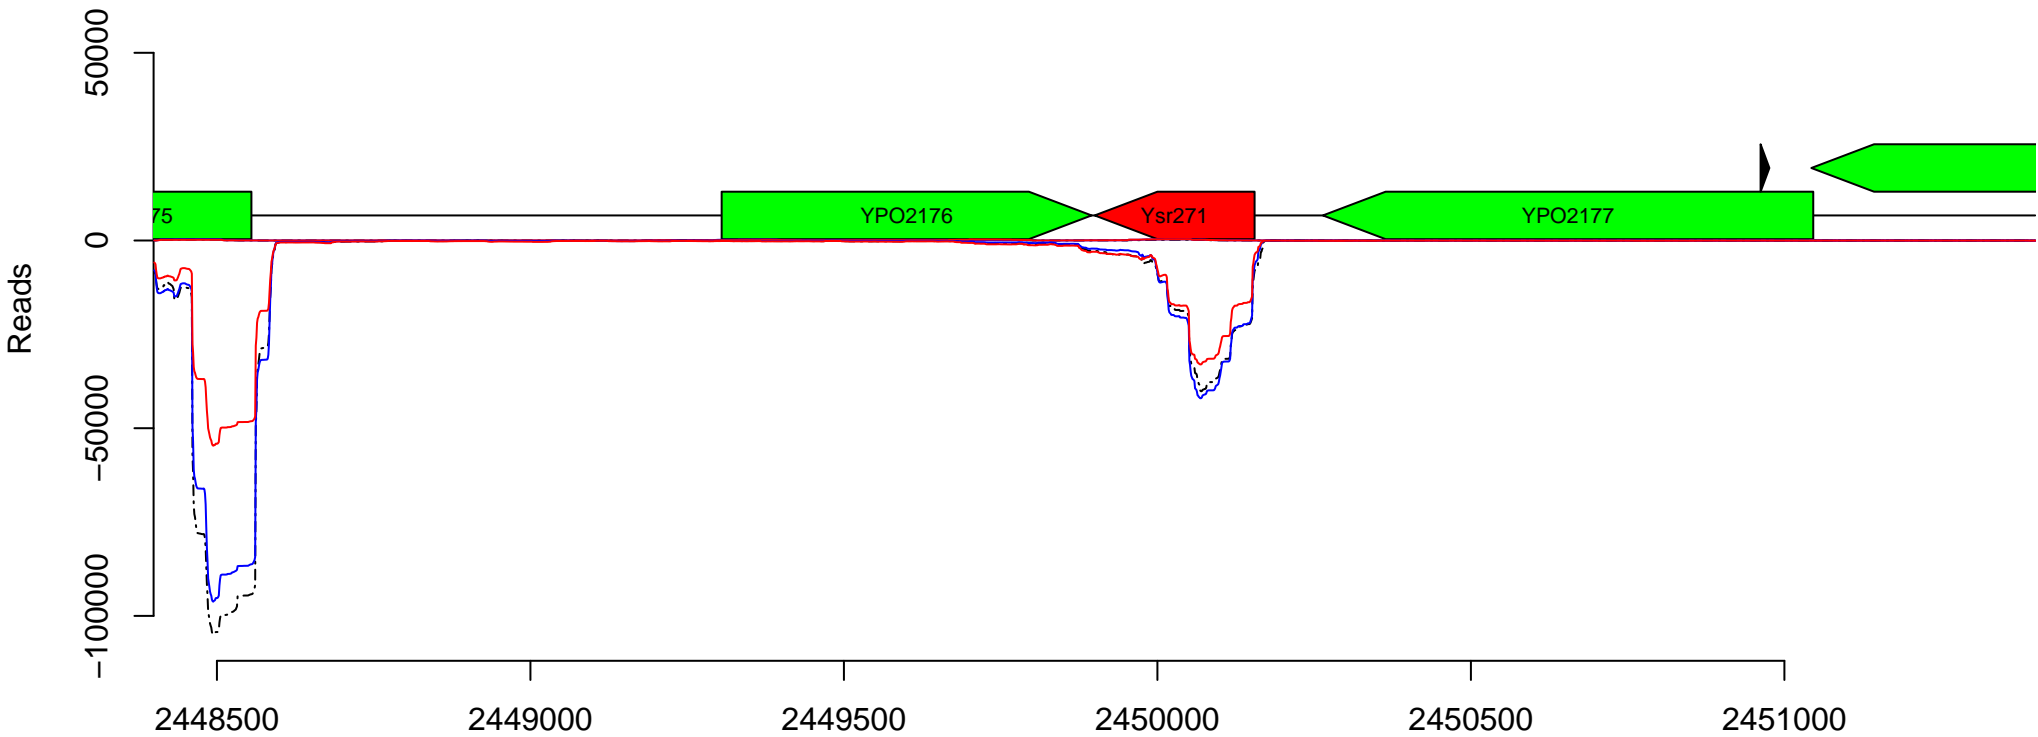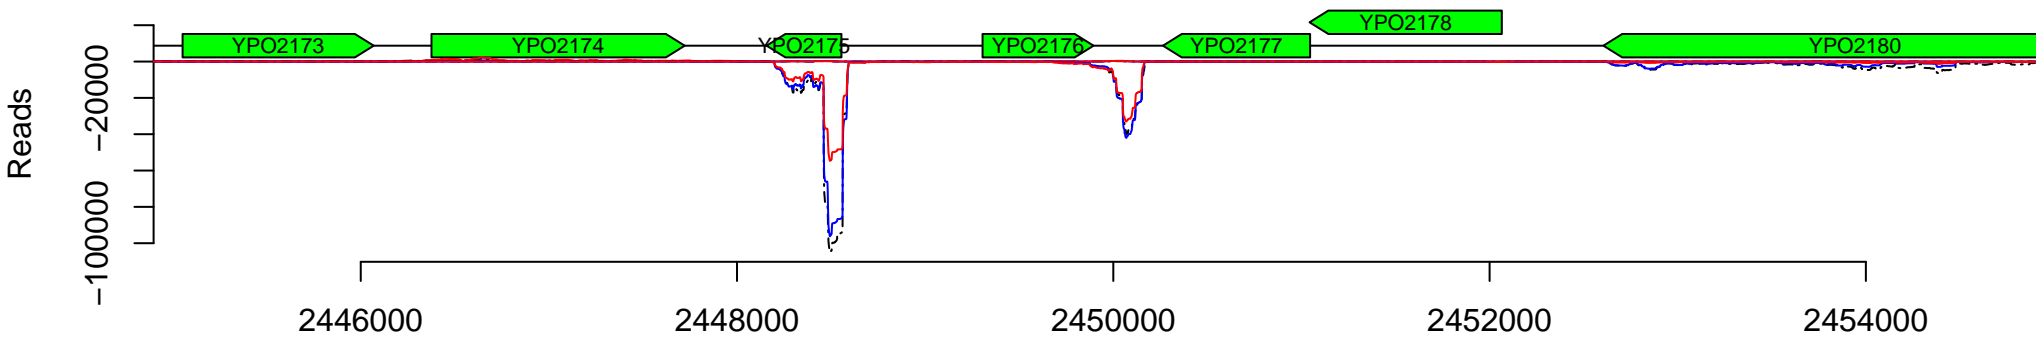



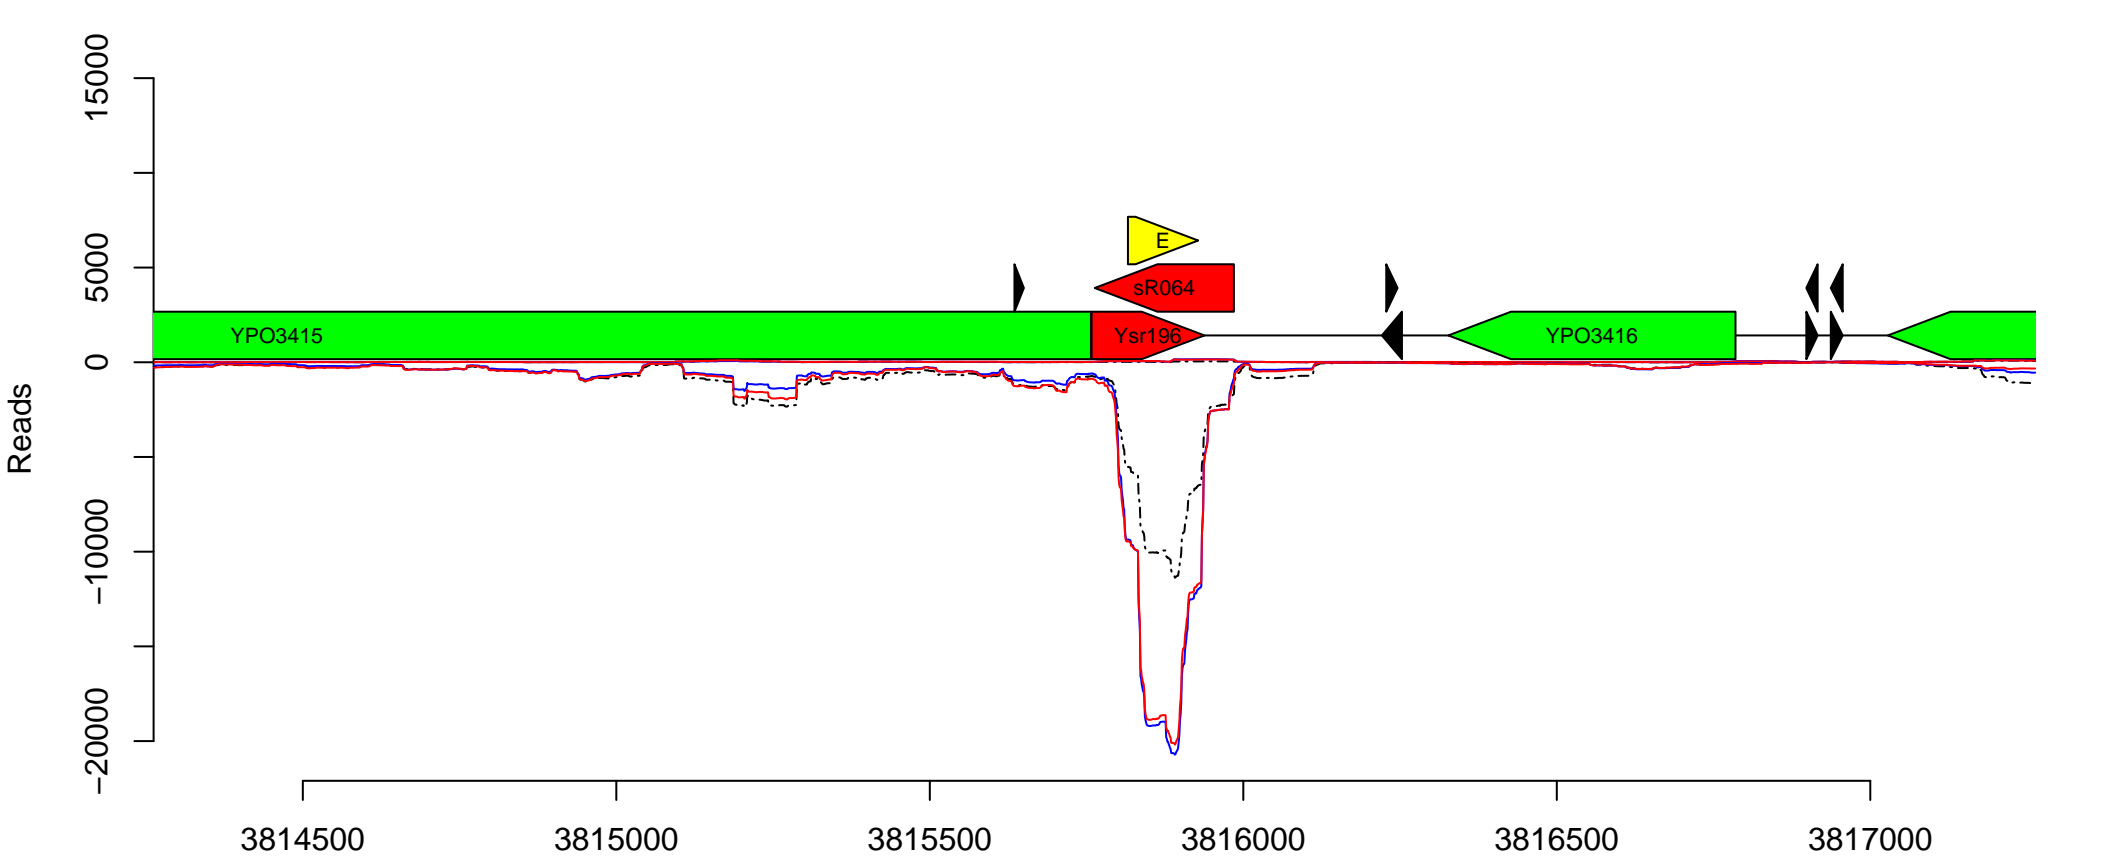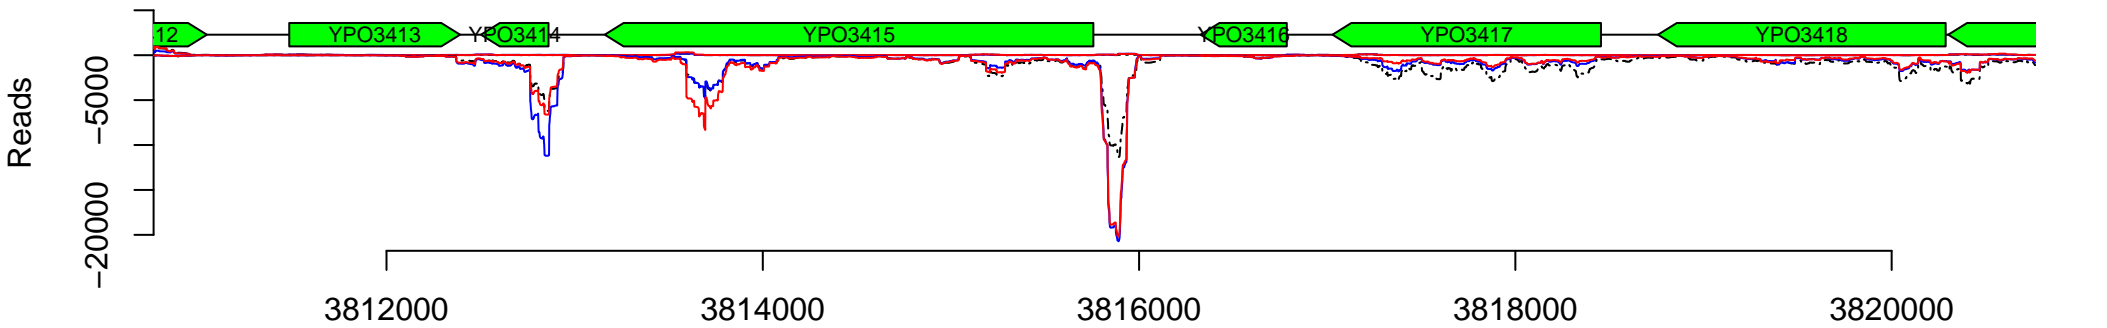

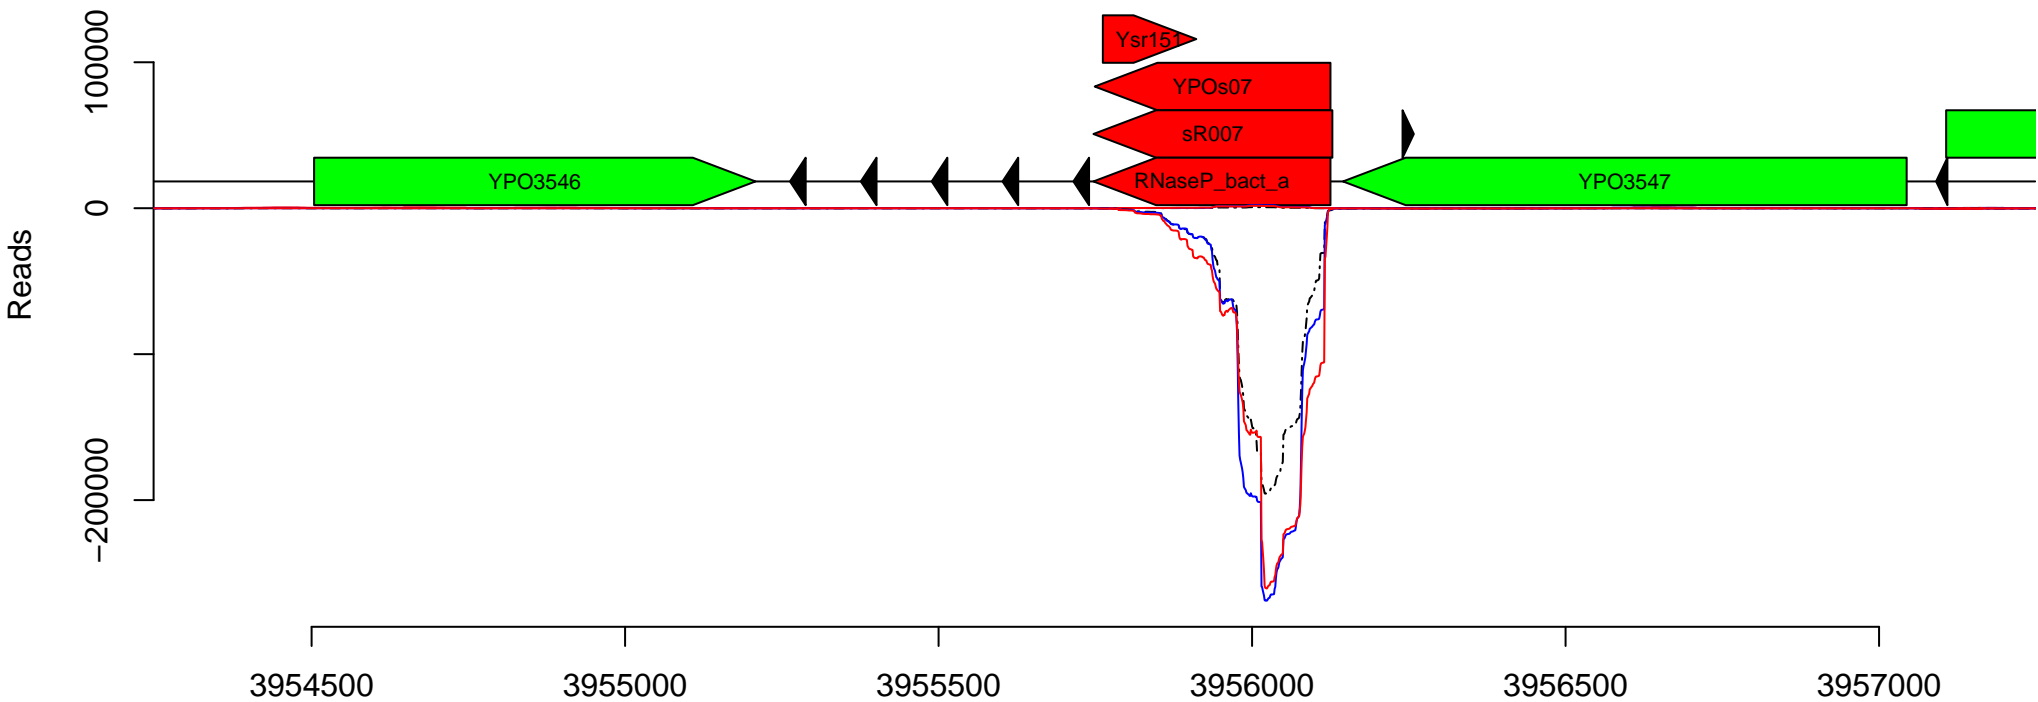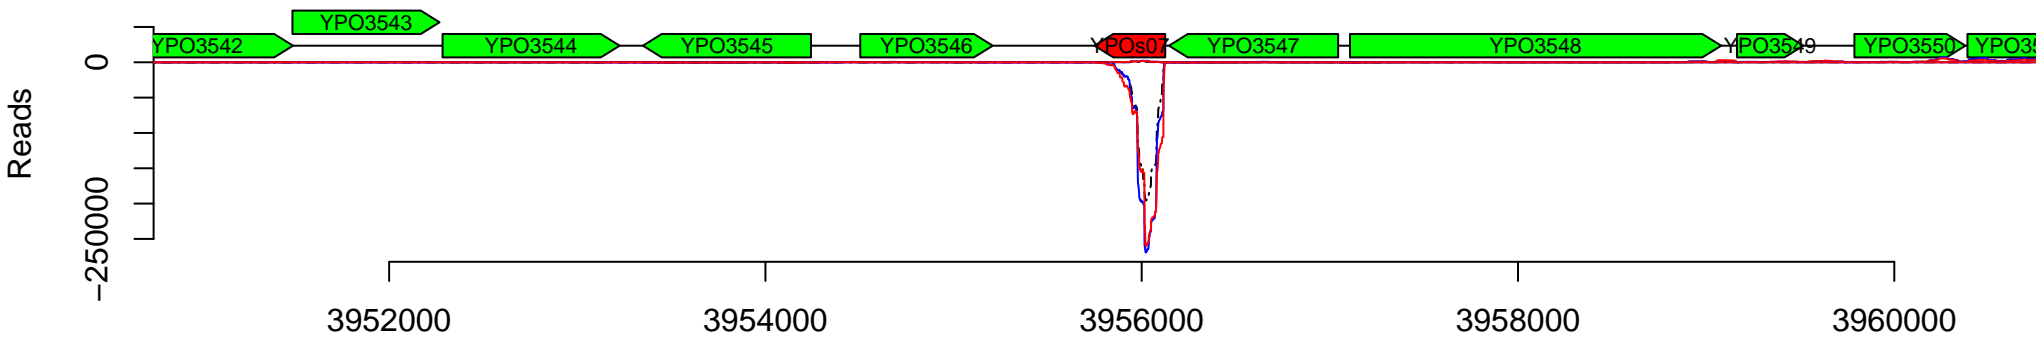

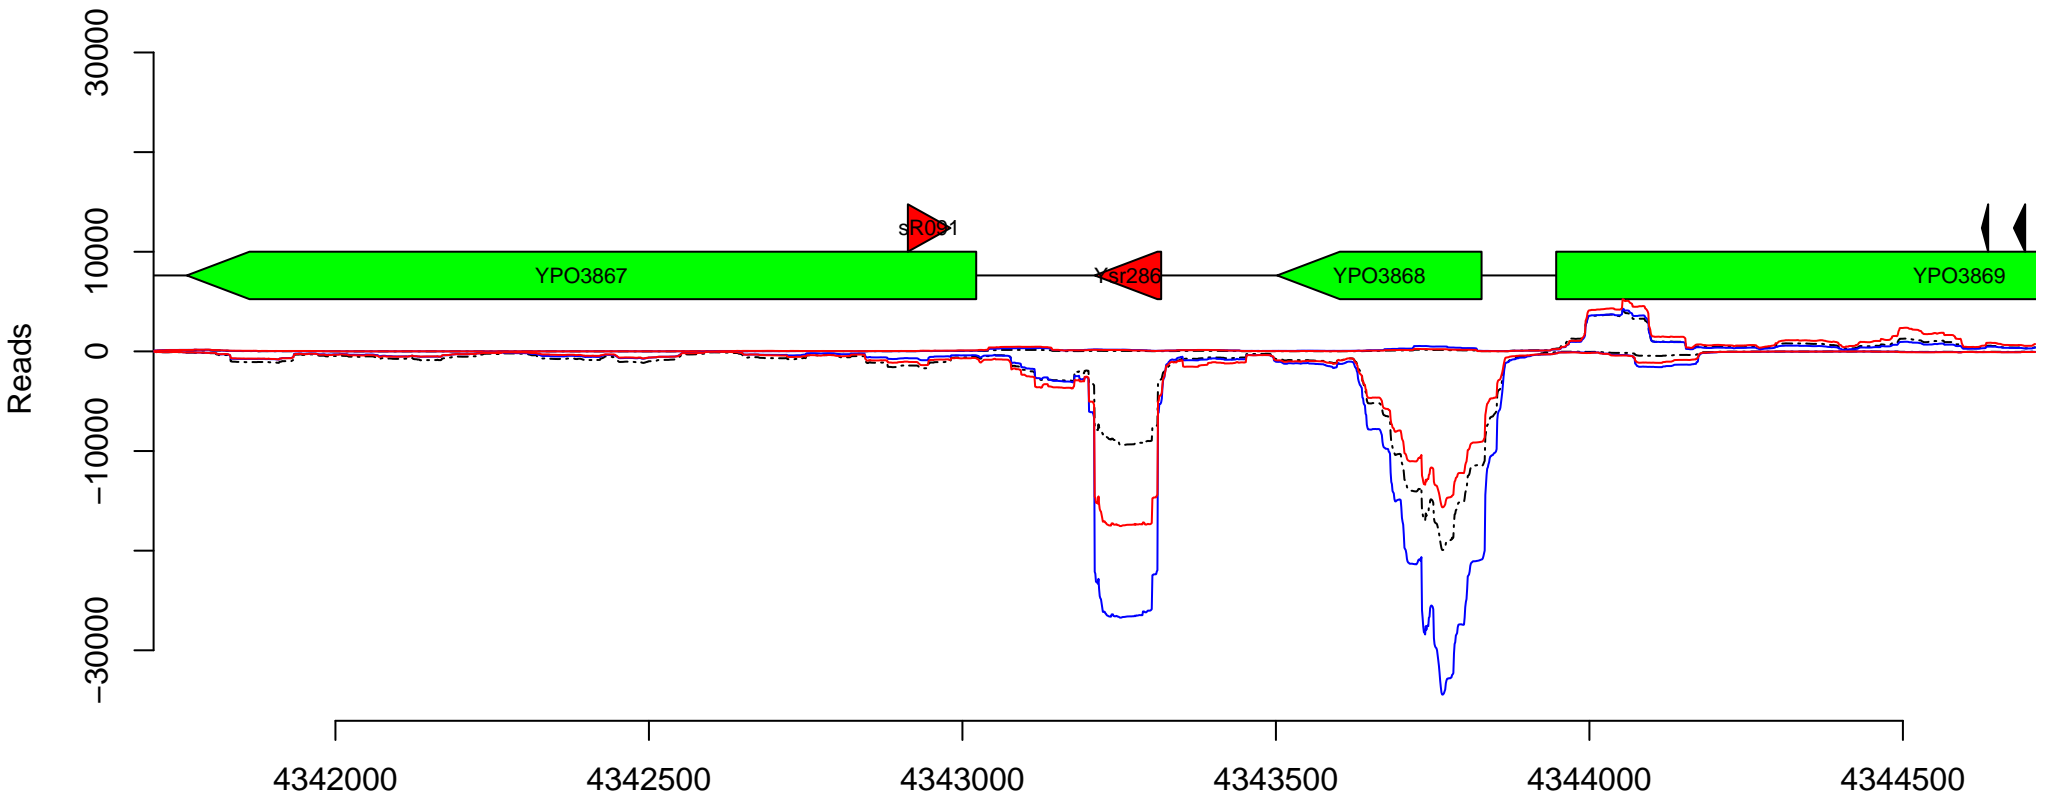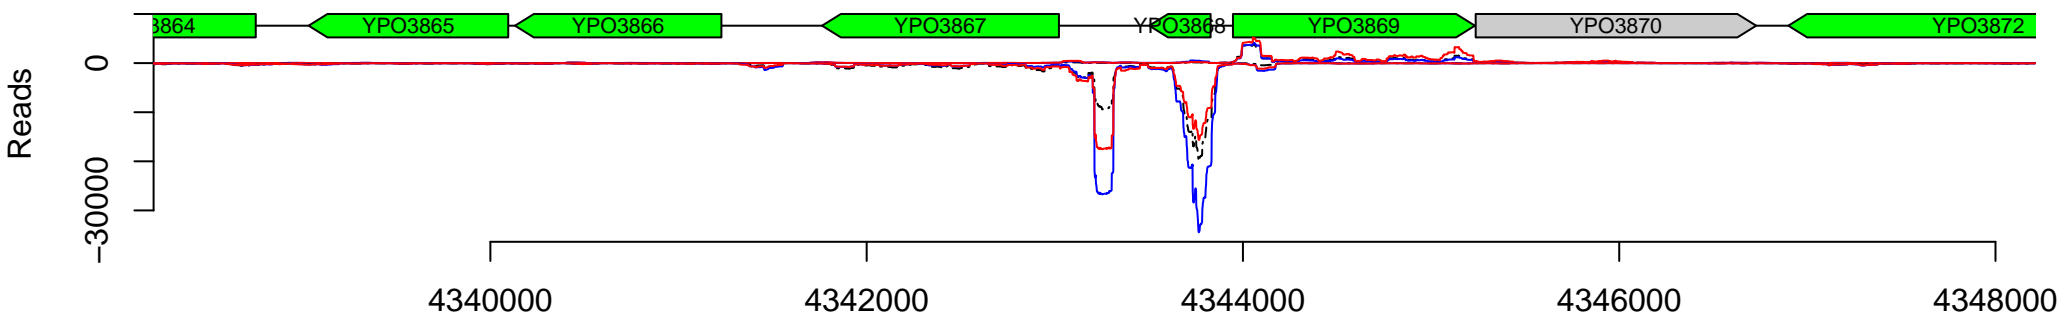

Supplement: pone.0168915.s001.pdf [file pone.0168915.s001.pdf]
