# Supplementary material for: Functional and Structural Analysis of a Highly-Expressed Yersinia pestis Small RNA following Infection of Cultured Macrophages
Source: PLoS One. 2016 Dec 28;11(12):e0168915. doi: 10.1371/journal.pone.0168915 (PMC5193452; doi:10.1371/journal.pone.0168915)
Supplement: S2 Table — This is a list of 180 small RNAs detected and the DEseq results table with mean normalized counts, fold change and p-values. (XLSX) [file pone.0168915.s003.xlsx]

## Sheet: Sheet1
S2 Table. List of 180 small RNAs detected and the DEseq results table with mean normalized counts, fold change and p-values. Coordinates adjusted for read counting are highlighted in red and novel sRNAs in this study are labeled ysr252-ysr288.
id	start	end	strand	width	Extracellular	Intracellular	log2FoldChange	pval
YPOs01/Spot_42/ysr186	25879	25982	+	104	154.45	78.81	-0.9708	0.3948
CsrC/sR026/ysr184/ysr188	27658	28043	+	386	286428	359960	0.3297	0.6342
sR094	72320	72426	-	107	234.28	164.67	-0.5087	0.679
sR082	73379	73469	-	91	3720.6	2496.09	-0.575863	0.453906
Ysr2	86855	87181	-	327	3373.24	1877.87	-0.845	0.2131
Ysr144	89129	89228	-	100	2312.21	1373.69	-0.751224	0.238643
sR103	93618	93719	-	102	51.9787	60.8478	0.227285	0.846156
sR047	157192	157480	-	289	6639.55	4866.76	-0.4481	0.6249
Ysr252	221477	221661	+	184	13409.5	4842.79	-1.4693	0.257
Ysr245	273729	273959	-	231	188.28	102.77	-0.8735	0.3839
Ysr253	285256	285358	-	102	28507.6	6695.07	-2.0902	0.0015
Ysr98	287852	288099	+	248	638.75	265.05	-1.269	0.1593
Ysr99	306208	306410	+	203	2637.39	909.11	-1.5366	0.6048
sR036	330563	330715	-	153	136.78	86.2	-0.6662	0.4837
Ysr101	348514	348709	+	196	481.9	348.04	-0.4695	0.5261
sR067	360050	360185	+	136	2008.29	1083.41	-0.8904	0.2267
Ysr254	456887	457053	+	166	9719.32	8021.43	-0.277	0.5894
sR035/Ysr104	472556	472924	+	369	1485.37	1893.9	0.3505	0.4865
Ysr255	482361	482554	-	193	11840.7	7929.85	-0.5784	0.468
sR006	483040	483282	+	243	892.55	686.11	-0.3795	0.826
Ysr190	488366	488466	+	101	429.4	229.09	-0.9064	0.3744
Ysr106	559823	560155	+	333	336.11	238.45	-0.4953	0.6934
SgrS/sR005/Ysr150	569568	569795	+	228	78.42	27.44	-1.5151	0.2222
Ysr6/Ysr31	573178	573433	+	256	27.88	18.55	-0.5877	0.5055
Leu_leader	579087	579232	-	146	263.98	259.43	-0.0251	0.6023
Ysr248	583754	583855	-	102	248.01	171.36	-0.5333	0.4499
Ysr256	612905	613056	-	151	16.19	13.31	-0.2827	0.8196
sR057	615600	615837	+	238	969.83	527.04	-0.8798	0.2908
Ysr257	618709	618898	+	189	1405.65	1041.66	-0.4324	0.5747
Ysr258	630197	630330	-	133	7472.87	5643.32	-0.4051	0.8362
Ysr85	698996	699130	+	135	852.05	615.92	-0.4682	0.5348
Ysr259	740818	740921	-	103	10917.9	8354.73	-0.386	0.7232
sR093	850956	851213	+	258	1273.8	800.75	-0.6697	0.3881
sR029	865815	865937	+	123	5507.29	4675.71	-0.2362	0.8498
OmrA-B/sR014/Ysr149/Ysr181	871435	871529	-	95	36.02	26.26	-0.4559	0.7404
Ysr247	944658	944791	-	134	103.68	45.9	-1.1756	0.5135
Ysr131	996150	996316	+	167	101.2	59.06	-0.7768	0.3001
sR062	1001318	1001506	+	189	16479.4	9710.86	-0.763	0.2427
YPOs02/6S/sR017/Ysr182	1001993	1002174	+	182	106513	130705	0.2953	0.4027
Ysr81	1022884	1023053	-	170	924.08	899.79	-0.0384	1
Ysr82	1053358	1053774	-	417	406.15	260.15	-0.6427	0.4307
Ysr241	1094711	1094885	-	175	217.09	101.2	-1.1011	0.2398
GcvB/sR013/Ysr45/Ysr180	1169590	1169794	-	205	57948.9	22334.1	-1.3755	0.0262
YPOs03/CsrB/sR003/Ysr179	1177074	1177355	+	282	311513	129602	-1.2652	0.5923
Ysr260	1190114	1190273	+	159	200.99	224.85	0.1618	0.6166
STAXI	1240037	1240174	-	138	705.18	441.45	-0.6757	0.4683
YPOs04/tmRNA/sR022	1245588	1245951	+	364	30942.8	36622.1	0.2431	0.5527
Ysr261	1263301	1263414	-	113	1178.54	790.24	-0.5766	0.377
MOCO_RNA_motif/Ysr177	1306720	1306866	+	147	709.49	671.37	-0.0797	0.9307
Ysr63	1335355	1335533	-	179	410.86	274.16	-0.5836	0.5994
Ysr262	1426268	1426397	+	129	26047.8	6105.59	-2.093	0.1968
RybB/sR023/Ysr48	1491835	1491915	-	81	24.81	22.8	-0.1221	0.9076
Ysr114	1543738	1544019	+	282	5101.83	2555.98	-0.9971	0.198
sR046	1545433	1545871	+	439	11689.2	10056.9	-0.217	0.7738
Ysr263	1600354	1600456	+	102	627.39	283.64	-1.1453	0.5755
Ysr264	1710770	1711027	-	257	1010.31	689.01	-0.5522	0.4484
Ysr265	1732803	1732911	-	108	2410.76	1490.2	-0.694	0.2603
sR008/His_leader	1765223	1765445	-	223	3616.41	2384.71	-0.6007	0.2524
rne5/sR010	1816440	1816777	-	338	7327.13	5268.19	-0.4759	0.457
Ysr219	1826451	1826721	-	271	210.89	176.27	-0.2587	0.8943
Ysr266	1833894	1834058	-	164	3441.51	2102.22	-0.7111	0.2288
Ysr165	1846519	1846736	+	218	689.37	816.53	0.2442	0.3561
Ysr19	1868675	1868990	+	316	1157.64	753.94	-0.6187	0.3869
Ysr77	1879647	1879912	+	266	845.8	424.68	-0.9939	0.3966
YPO1655a/cspA	1883592	1883705	+	114	25.32	8.48	-1.5783	0.418
Ysr18	1886914	1887071	-	158	181.51	102.6	-0.823	1
Ysr125	1926529	1926705	-	177	195.48	159.64	-0.2922	0.642
Ysr172	1973419	1973641	-	223	85470.2	59832.5	-0.5145	0.3677
Ysr192	1983103	1983280	+	178	7634.55	8413.23	0.1401	0.5118
Ysr267	1984270	1984474	+	204	1556.62	1155.89	-0.4294	0.5121
YPO1745a/cspA	1989313	1989435	+	123	135236	17426.5	-2.9561	0.2582
yybP-ykoY	1999916	2000115	-	200	114.06	206.48	0.8562	0.6682
Ysr171	2000965	2001095	+	131	208.08	200.67	-0.0524	1
Ysr268	2003821	2003935	-	114	15361.7	9125.65	-0.7513	0.2051
sR074/Ysr68	2016358	2016468	-	111	436.51	489.12	0.1642	0.7508
Ysr117	2018422	2018610	+	189	271.52	173.57	-0.6456	0.5211
sR073	2027880	2028036	-	157	492.24	550.05	0.1602	0.3613
SraC_RyeA	2032700	2032846	-	147	114.44	78.79	-0.5385	0.5146
sR048	2182650	2182780	-	131	8536.18	5495.99	-0.6352	0.4294
Ysr119	2223718	2223891	+	174	1718.47	1522.51	-0.1747	0.7468
Ysr15	2227846	2227957	-	112	546.51	410.01	-0.4146	0.6605
Ysr193	2238370	2238575	+	206	15391.3	7992.31	-0.9454	0.3382
Ysr170	2265980	2266341	-	362	4069.08	48609	3.5784	0.1446
sR076	2272030	2272246	+	217	265.64	135.05	-0.9759	0.3713
Ysr71	2293627	2293856	-	230	1556.8	1033.7	-0.5908	0.4957
sR049/Ysr222	2330602	2331076	-	475	432.65	503.35	0.2183	0.5227
Ysr72	2348575	2348715	+	141	976.84	630.27	-0.6322	0.4673
Ysr269	2354073	2354202	-	129	735.28	527.04	-0.4804	0.6188
sR088	2426859	2427165	+	307	24365.7	14209	-0.778	0.3855
Ysr212	2430928	2431150	+	223	899.04	912.71	0.0218	0.8535
Ysr270	2443162	2443267	+	105	1637.89	1344.95	-0.2843	0.7067
sR079	2444784	2444911	+	128	383.05	194.35	-0.9789	0.274
Ysr271	2449900	2450155	-	255	71198.4	52814.9	-0.4309	0.483
Ysr272	2468332	2468629	-	297	2738.82	4008.98	0.5497	0.9349
Ysr123	2510421	2510606	+	186	280.29	175.55	-0.675	0.4537
sR085	2518817	2518963	+	147	260.22	241.09	-0.1101	0.6321
sR051/Ysr17	2623350	2623566	-	217	2227.66	1543.31	-0.5295	0.4607
Ysr12/Ysr75	2629890	2629999	-	110	352.67	245.15	-0.5246	0.4057
frnS/Ysr11/Ysr166	2631096	2631213	-	118	37.33	36	-0.0522	1
RyhB/sR009/Ysr146/Ysr187	2646952	2647016	-	65	242.38	25.49	-3.2493	0.3144
Ysr217/Ysr250	2654438	2654728	-	291	557.05	429.48	-0.3752	0.6393
Ysr273	2667315	2667437	-	122	4046.82	1944.07	-1.0577	0.4574
Ysr274	2701966	2702093	+	127	2134.64	2120.27	-0.0097	0.7861
Ysr195	2723999	2724273	+	275	642.57	402.26	-0.6757	0.449
sR089	2738711	2738853	-	143	1754.18	1425.16	-0.2997	0.8132
YenS/Ysr164	2755716	2755942	+	227	1774.35	1314.76	-0.4325	0.958
Ysr143	2764588	2764660	+	73	213.73	139.95	-0.6109	0.6147
Ysr202	2804420	2804655	+	236	330.58	297.31	-0.153	0.9266
Ysr275	2839614	2839780	+	166	51.09	34.47	-0.568	0.395
Ysr276	2841574	2841698	-	124	1071.62	418.62	-1.3561	0.3238
Ysr113	2910467	2910703	+	237	521.76	243.59	-1.0989	0.1967
sR043	2964127	2964312	+	186	578.01	329.57	-0.8105	0.3108
Ysr208	2991021	2991267	+	247	1647.61	2287.78	0.4736	0.7809
Ysr237	3011449	3011883	-	435	1466.46	1302.57	-0.171	0.7349
Ysr78	3080661	3080975	+	315	5418.3	3740.09	-0.5348	0.5474
sR028	3154463	3154572	-	110	16.01	12.79	-0.3237	1
CyaR_RyeE/sR012/Ysr159	3192739	3192826	+	88	7.01	11.78	0.7501	0.2576
Ysr277	3193126	3193244	+	118	1255.1	896.53	-0.4854	0.7484
TPP/sR002	3197047	3197151	-	105	681.77	907.97	0.4133	0.4866
Ysr147	3260423	3260666	+	244	212.55	194.25	-0.1299	0.6729
sR011/GlmY_tke1	3260558	3260857	-	300	1389.03	1788.22	0.3644	0.4372
Ysr129	3371989	3372252	+	264	972.54	621.7	-0.6455	0.3756
sR056	3394783	3395099	+	317	966.14	922.55	-0.0666	0.9725
Ysr23/Ysr160	3401406	3401611	-	206	788.04	1004.89	0.3507	0.7118
sroB/Ysr145/Ysr147	3445704	3445785	-	82	69.91	50.41	-0.4719	0.2585
sR021/Ysr112	3473579	3473733	-	155	1002.91	833.78	-0.2665	0.663
Ysr278	3496394	3496544	+	150	869.59	336.78	-1.3685	0.2227
YPOs06/Bacteria_small_SRP/sR020/Ysr156	3498454	3498573	-	120	1034.97	523.1	-0.9844	0.4205
Ysr60	3503185	3503269	+	85	154.28	91.79	-0.7491	0.4063
Ysr279	3562547	3562651	-	104	5218.76	6684.18	0.357	0.4708
Ysr280	3606619	3606728	-	109	8161.74	4953.17	-0.7205	0.4635
Ysr8	3622908	3623204	+	297	73.61	24.59	-1.582	0.3258
Ysr281	3662096	3662227	-	131	1806.58	1590.64	-0.1837	1
MicA/sR004/Ysr7/Ysr154	3679300	3679371	+	72	37.16	30.41	-0.2893	0.9787
sR034/Ysr59	3683065	3683227	+	163	1204.65	1077.69	-0.1607	1
sR065/Ysr110	3701517	3701643	-	127	641.71	505.27	-0.3449	0.5681
Ysr233	3734250	3734508	-	259	179.7	58.35	-1.6228	0.1381
Ysr109/Ysr232	3740605	3740919	-	315	736.92	895.71	0.2815	0.4805
Ysr57	3740924	3741099	-	176	332.83	266.17	-0.3224	0.867
sR064/Ysr196	3815763	3815985	-	223	30498.5	27988.3	-0.1239	0.9716
Ysr282	3824495	3824602	+	107	5291.39	6101.82	0.2056	0.516
Ysr108	3826285	3826488	-	204	524.49	529.34	0.0133	0.7297
sR063	3827470	3827722	-	253	1731.44	2381.6	0.46	0.2966
sR102	3841455	3841698	+	244	401.51	266.74	-0.59	0.559
sR039	3845888	3846119	+	232	2735.55	2811.93	0.0397	0.6714
Ysr103	3855098	3855233	-	136	11420.8	5267.38	-1.1165	0.4116
sR100	3866931	3867067	-	137	1371.67	804.35	-0.77	0.2777
rimP	3908804	3908904	-	101	1207.51	1009.04	-0.259	0.9516
greA/sR087	3915951	3916070	-	120	27569.9	10664.5	-1.3703	0.0201
YPOs07/RNaseP_bact_/sR007/Ysr151	3955749	3956125	-	377	691907	551206	-0.328	0.4078
sR018	3962669	3962865	+	197	316.9	173.38	-0.8701	0.6125
Ysr200/symR	4025524	4025602	+	79	179.94	80.65	-1.1578	0.3514
Ysr25	4074854	4074983	+	130	293.75	234.63	-0.3242	0.5945
Ysr205	4083446	4083642	+	197	1098.41	771.7	-0.5093	0.5014
Ysr283	4122174	4122369	+	195	14798.1	17702.2	0.2585	1
Ysr284	4174615	4174799	+	184	4329.64	2297.96	-0.9139	0.2479
Ysr230	4180640	4180857	-	218	11188.8	3860.97	-1.535	0.3669
sR097	4196261	4196382	+	122	191.49	141.75	-0.4339	0.5588
sR030/Ysr51	4205758	4205843	-	86	4112.42	2793.76	-0.5578	0.5086
Ysr50	4278148	4278222	-	75	3365.31	2681.1	-0.3279	1
Ysr228	4319462	4319606	-	145	1600.1	895.19	-0.8379	0.2528
GlmZ_SraJ/sR016/Ysr148/Ysr153	4324524	4324746	-	223	1160.02	937.38	-0.3074	0.97
Ysr285	4327557	4327712	+	155	1768.4	1305.22	-0.4381	0.6546
sR059/Ysr229	4341323	4341563	-	241	2467.54	1742.67	-0.5018	0.5473
Ysr286	4343211	4343317	-	106	41656.1	24912	-0.7417	0.3855
Ysr28	4375368	4375649	-	282	1604.83	647.86	-1.3087	0.1268
Cobalamin/sR058	4392988	4393250	-	263	1665.42	1410.46	-0.2397	0.851
Ysr3	4413829	4414219	+	391	5914.89	5386.22	-0.1351	0.9264
sR032	4432577	4432753	-	177	2560.18	3296.43	0.3647	0.4879
Ysr199	4446991	4447168	+	178	235.84	217.65	-0.1158	0.983
RyhB/sR024/Ysr146.2/Ysr187	4454766	4454831	-	66	65.71	16.73	-1.9738	0.155
sR033	4469224	4469633	-	410	413.75	593.99	0.5217	0.4424
Ysr27	4470656	4470828	-	173	1278.3	896	-0.5127	0.6008
sR092	4479491	4479616	-	126	353.49	170.29	-1.0537	0.1406
Ysr136	4493548	4493810	+	263	248.63	144.54	-0.7826	0.4721
Ysr137	4499718	4500053	+	336	1946.16	1080.41	-0.849	0.2019
Ysr287	4513530	4513632	-	102	9777.34	7126.45	-0.4563	0.5762
Ysr47	4517417	4517661	+	245	115.97	70.07	-0.7269	0.6765
Ysr203	4590844	4591059	+	216	3130.72	2174.83	-0.5256	0.4815
Ysr288	4620184	4620385	+	201	64425.6	14830.2	-2.1191	0.0758
